# Supplementary material
Source: PubMed Central journal article supplement (PMC5884117)
Supplement: NIHMS954116-supplement-Supporting_Information.pdf [file NIHMS954116-supplement-Supporting_Information.pdf]

## Supporting Information Figure Legends

**Supporting Information Fig 1.** Deletion of YY1 in *IgκAID yy1<sup>ff</sup>* splenic B cells affects CSR and nuclear AID levels. Splenic B cells isolated from *IgκAID yy1<sup>ff</sup>* mice were either mock treated, or treated with TAT-CRE to delete YY1, then grown in LPS plus IL4 for 3 to 4 days. (A) CSR was evaluated by FACS with anti-IgG1 antibody. A representative FACS plot is shown. This experiment was repeated over six times. (B) Quantitation of CSR data in B cells from six *IgκAID yy1<sup>ff</sup>* mice either mock treated, or treated with TAT-CRE. Error bars show the standard deviation of the mean, and triple asterisks indicate  $p < 0.001$  in a two tailed T-test. (C) Nuclear protein levels in response to YY1 deletion were assayed by immunoblotting with anti-AID, anti-YY1 and anti-TBP antibodies. A representative blot from 3 experiments is shown. (D). Quantitation of three experiments showing reduction of AID/TBP ratios after TAT-CRE treatment. Error bars represent standard deviation of the mean and the asterisk represents  $p < 0.05$  in a two tailed T-test.

**Supporting Information Fig. 2.** Mutation frequencies at  $S_{\mu}$  in splenic B cells from six individual *IgκAID yy1<sup>ff</sup>* mice are presented. Isolated splenic B cells were either mock treated, or treated with TAT-CRE to delete the *yy1* gene, then induced with LPS plus IL4 in culture for 4 days. DNA was isolated, the  $S_{\mu}$  region was amplified by PCR, cloned, and subjected to Sanger sequencing. Each bar represents the average of the mutation frequencies of each sequenced clone.

The number of clones, base pairs sequenced, and mutations observed are presented in Supporting Information Table 1. Asterisks represent  $p < 0.05$  in a two tailed T-test.

**Supporting Information Fig. 3.** Variant allele frequency (VAF) at the  $S_{\mu}$  locus is shown in mock and TAT-CRE treated samples compared to the AID knockout background. BAM files from 6 independent NGS runs were merged. Line graphs show VAFs for all sequenced positions. Mock samples are red, TAT-CRE samples are green and AID KO samples are black. P values were calculated using the Wilcoxon test. The box plot shows VAF distribution in mock, TAT-CRE and AID KO samples. Graphs depict minimum and maximum values (whiskers), first and third quartile, and the median. Dots represent outliers. P values were calculated using the Mann-Whitney test.

**Supporting Information Fig. 4.** Variant allele frequency (VAF) at the Jh4 locus is shown in mock and TAT-CRE treated samples compared to the AID knockout background. BAM files from 6 independent NGS runs were merged. Line graphs show VAFs for all sequenced positions. Mock samples are red, TAT-CRE samples are green and AID KO samples are black. P values were calculated using the Wilcoxon test. The box plot shows VAF distribution in mock, TAT-CRE and AID KO samples. Graphs depict minimum and maximum values (whiskers), first and third quartile, and the median. Dots represent outliers. P values were calculated using the Mann-Whitney test.

**Supporting Information Fig. 5.**

Variant allele frequency (VAF) at the Cd83 locus is shown in mock and TAT-CRE treated samples compared to the AID knockout background. BAM files from 6 independent NGS runs were merged. Line graphs show VAFs for all sequenced positions. Mock samples are red, TAT-CRE samples are green and AID KO samples are black. P values were calculated using the Wilcoxon test. The box plot shows VAF distribution in mock, TAT-CRE and AID KO samples. Graphs depict minimum and maximum values (whiskers), first and third quartile, and the median. Dots represent outliers. P values were calculated using the Mann-Whitney test.

**Supporting Information Fig. 6.** Evaluation of the effect of wild-type YY1 and YY1 mutants on the level of AID ubiquitination. HEK293T cells were transfected with CMV-FlagAID plus either GALYY1 or various YY1 mutants. Two days after transfection cells were treated with MG132 to inhibit proteosomal degradation, nuclear extracts were prepared, heated to dissociate protein interactions, immunoprecipitated with anti-Flag, then subjected to western blot with anti-ubiquitin antibody. Blots were subsequently stripped and probed with anti-Flag to indicate the level of AID. Level of ubiquitination (percent or fold difference) was calculated using densitometric measurement of ubiquitin signal normalized to the level of immunoprecipitated AID. (A) Nine independent experiments with wild

type YY1 fused to the GAL4 DNA binding domain. Blue bars show the level of AID ubiquitination without co-transfected YY1 (defined as 100%), and red bars show the relative level in the presence of YY1. (B) Seven independent experiments with the GALYY1 1-200 mutant containing YY1 amino acids 1-200. Blue bars show the level of AID ubiquitination without co-transfected YY1 1-200 (defined as 100%), and red bars show the relative level in the presence of YY1 1-200. (C) Experiments with GALYY1 1-200 compared to GALYY1 1-200 $\Delta$ 16-80. The level of AID ubiquitination observed with GALYY1 1-200 was defined as 1, and the level of AID ubiquitination with GALYY1 1-200 $\Delta$ 16-80 was calculated relative to this value.

**A***IgκAID yy1<sup>f/f</sup>*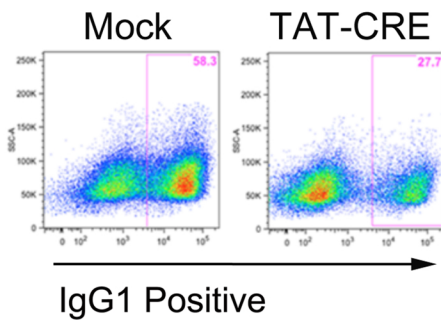**B***IgκAID yy1<sup>f/f</sup>*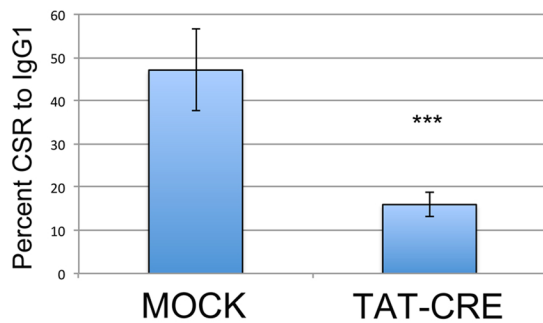**C**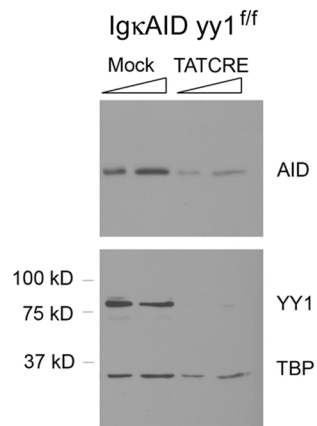**D***IgκAID yy1<sup>f/f</sup>*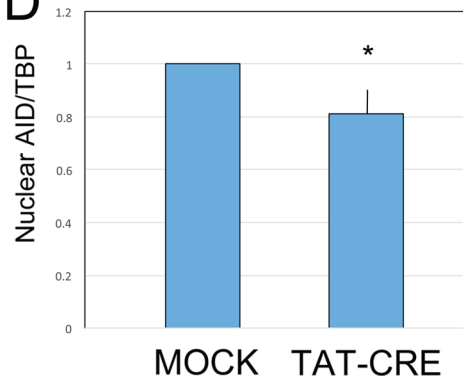

Supporting Information Fig. 1

IgκAID *yy1*<sup>f/f</sup> S<sub>μ</sub> site

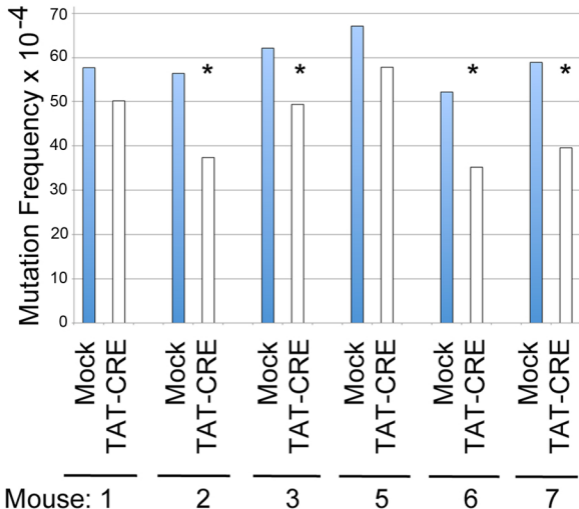

Supporting Information Fig. 2

## $S_{\mu}$ locus

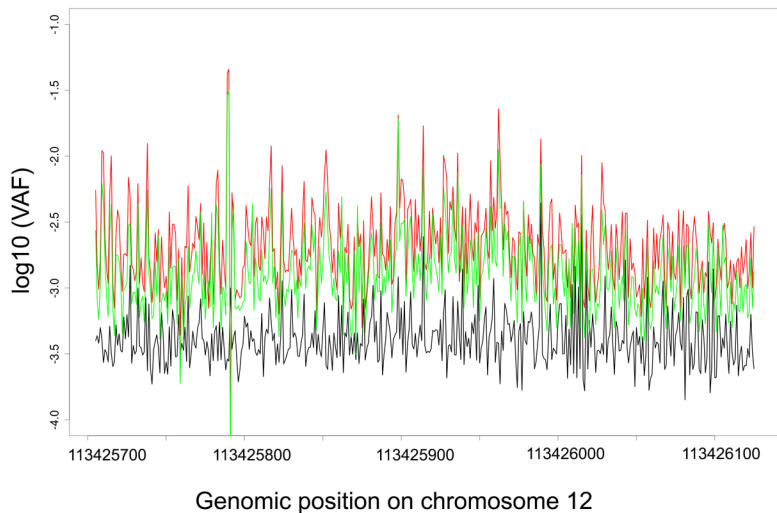

AID KO vs. MOCK  $p < 0.001$

AID KO vs. TAT-CRE  $p < 0.001$

MOCK vs. TAT-CRE  $p < 0.001$

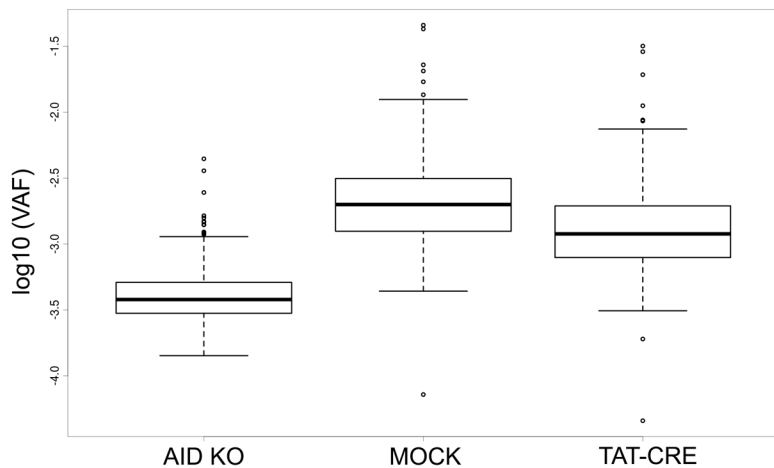

AID KO vs. MOCK  $p < 0.001$

AID KO vs. TAT-CRE  $p < 0.001$

MOCK vs. TAT-CRE  $p < 0.001$

Supporting Information Fig. 3

## Jh4 locus

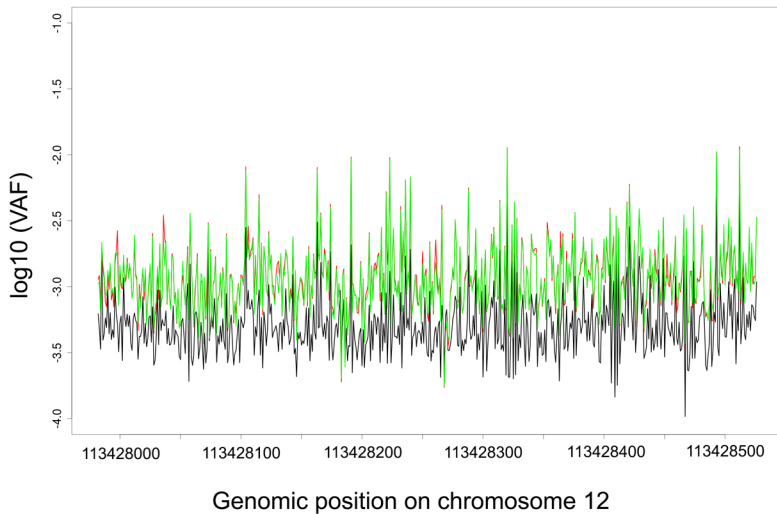

AID KO vs. MOCK  $p < 0.001$

AID KO vs. TAT-CRE  $p < 0.001$

MOCK vs. TAT-CRE  $p = 0.027$

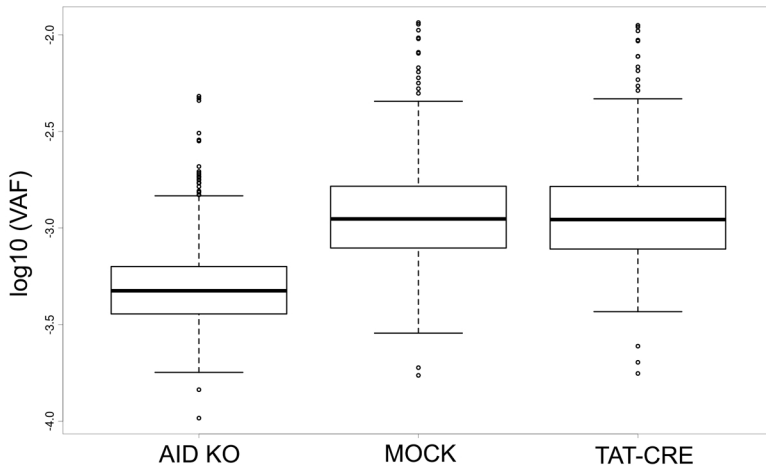

AID KO vs. MOCK  $p < 0.001$

AID KO vs. TAT-CRE  $p < 0.001$

MOCK vs. TAT-CRE  $p = 0.625$

Supporting Information Fig. 4



## Cd83 locus

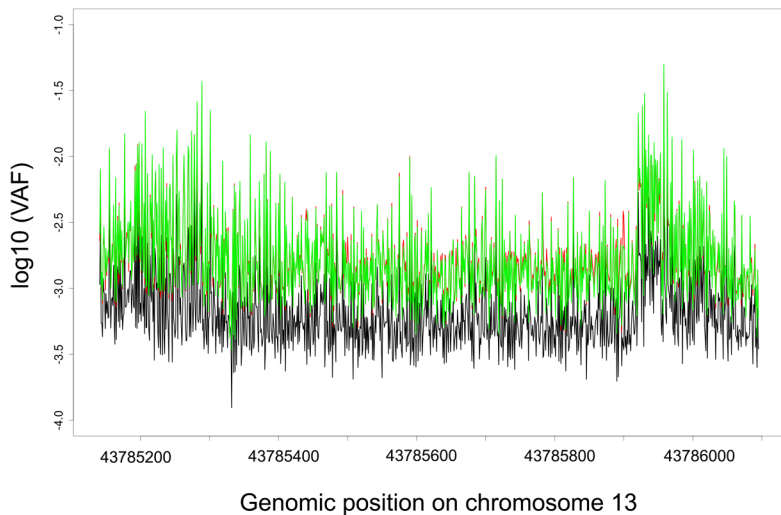

AID KO vs. MOCK  $p < 0.001$

AID KO vs. TAT-CRE  $p < 0.001$

MOCK vs. TAT-CRE  $p < 0.001$

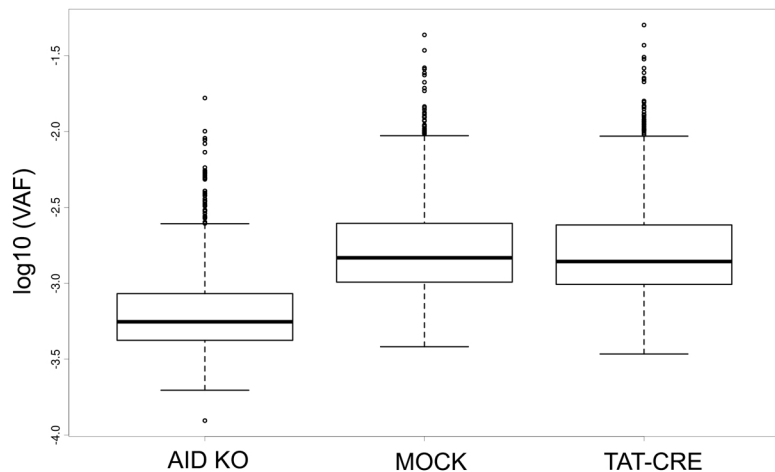

AID KO vs. MOCK  $p < 0.001$

AID KO vs. TAT-CRE  $p < 0.001$

MOCK vs. TAT-CRE  $p = 0.260$

Supporting Information Fig. 5

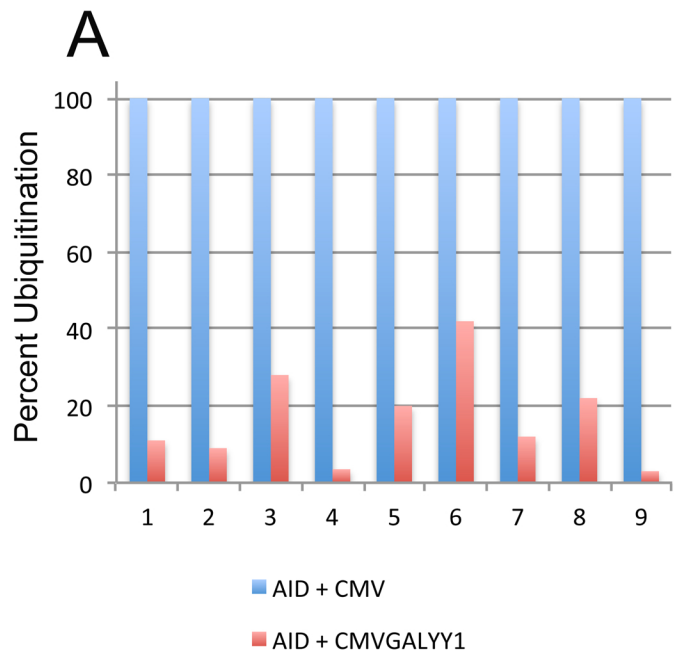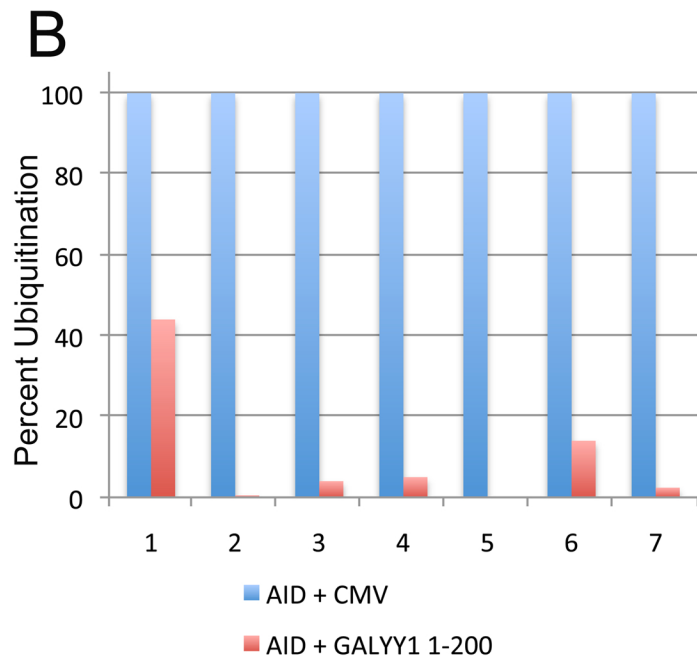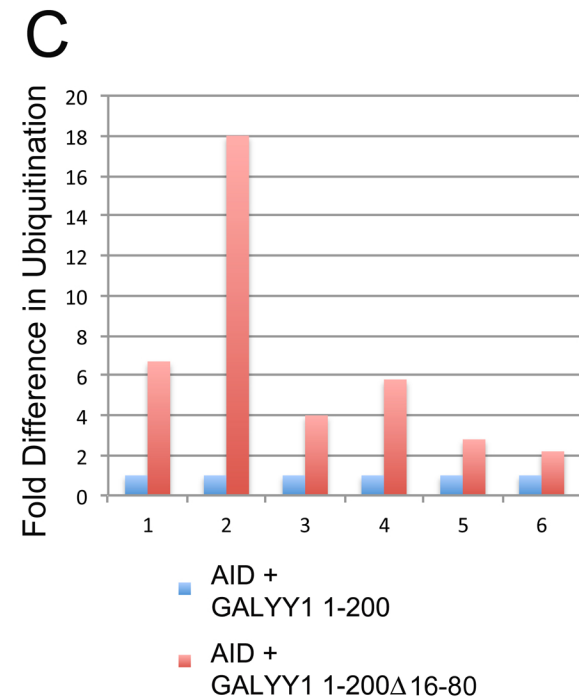

Supporting Information Fig. 6

**Supporting Information Table 1.**  
**Mutation Frequency at S $\mu$  in Individual Mice**

| Individual Mice    | BP Sequenced          | Mutation Numbers | Individual Clones |
|--------------------|-----------------------|------------------|-------------------|
| Mock 1             | 8,050                 | 46               | 16                |
| Mock 2             | 12,226                | 67               | 23                |
| Mock 3             | 17,648                | 108              | 34                |
| Mock 5             | 16,959                | 115              | 32                |
| Mock 6             | 21,503                | 112              | 40                |
| Mock 7             | 21,752                | 128              | 40                |
| Total              | 98,138                | 576              | 185               |
| Mutation Frequency | $58.7 \times 10^{-4}$ |                  |                   |

| Individual Mice    | BP Sequenced          | Mutation Numbers | Individual Clones |
|--------------------|-----------------------|------------------|-------------------|
| CRE 1              | 9,505                 | 44               | 19                |
| CRE 2              | 10,897                | 42               | 22                |
| CRE 3              | 21,818                | 115              | 44                |
| CRE 5              | 18,881                | 109              | 35                |
| CRE 6              | 26,054                | 92               | 49                |
| CRE 7              | 20,479                | 86               | 40                |
| Total              | 107,479               | 488              | 209               |
| Mutation Frequency | $45.4 \times 10^{-4}$ |                  |                   |

**Supporting Information Table 2.**  
**Mutation Frequency at the TACI gene in Individual Mice**

| Individual Mice    | BP Sequenced          | Mutation Numbers | Individual Clones |
|--------------------|-----------------------|------------------|-------------------|
| Mock 1             | 11,300                | 2                | 22                |
| Mock 2             | 8,836                 | 0                | 22                |
| Mock 3             | 9,447                 | 0                | 20                |
| Total              | 29,583                | 2                | 64                |
| Mutation Frequency | $0.67 \times 10^{-4}$ |                  |                   |

| Individual Mice    | BP Sequenced          | Mutation Numbers | Individual Clones |
|--------------------|-----------------------|------------------|-------------------|
| CRE 1              | 4,582                 | 1                | 8                 |
| CRE 2              | 16,228                | 1                | 38                |
| CRE 3              | 11,266                | 0                | 25                |
| Total              | 32,076                | 2                | 71                |
| Mutation Frequency | $0.62 \times 10^{-4}$ |                  |                   |

**Supporting Information Table 3.**  
**Single Nucleotide Variant Frequency at S<sub>μ</sub>, Jh4 and Cd83 loci in Individual Mice**

| Individual Mice – S <sub>μ</sub> locus | BP Sequenced            | SNV Numbers |
|----------------------------------------|-------------------------|-------------|
| Mock 0                                 | 99,778,879              | 79,239      |
| Mock 1                                 | 120,356,081             | 107,799     |
| Mock 2                                 | 57,237,341              | 87,514      |
| Mock 3                                 | 198,973,861             | 183,599     |
| Mock A                                 | 55,619,471              | 9,357       |
| Mock B                                 | 56,915,133              | 6,275       |
| Total                                  | 588,880,766             | 473,783     |
| SNV frequency                          | 8.05 x 10 <sup>-4</sup> |             |

| Individual Mice – S <sub>m</sub> locus | BP Sequenced            | Mutation Numbers |
|----------------------------------------|-------------------------|------------------|
| CRE 0                                  | 211,355,005             | 64488            |
| CRE 1                                  | 210,238,001             | 69563            |
| CRE 2                                  | 242,835,784             | 104390           |
| CRE 3                                  | 204,392,640             | 66222            |
| CRE A                                  | 81,461,997              | 5186             |
| CRE B                                  | 52,891,753              | 1846             |
| Total                                  | 1,003,175,180           | 311,695          |
| SNV frequency                          | 3.11 x 10 <sup>-4</sup> |                  |

| Individual Mice – Jh4 locus | BP Sequenced            | SNV Numbers |
|-----------------------------|-------------------------|-------------|
| Mock 0                      | 417,923,425             | 26,871      |
| Mock 1                      | 213,422,572             | 16,914      |
| Mock 2                      | 180,102,614             | 12,584      |
| Mock 3                      | 298,623,948             | 22,715      |
| Mock A                      | 156,629,498             | 11,421      |
| Mock B                      | 247,871,918             | 6,418       |
| Total                       | 1,514,573,975           | 96,923      |
| SNV frequency               | 0.64 x 10 <sup>-4</sup> |             |

| Individual Mice – Jh4 locus | BP Sequenced             | Mutation Numbers |
|-----------------------------|--------------------------|------------------|
| CRE 0                       | 356,204,935              | 5,977            |
| CRE 1                       | 219,764,547              | 3,907            |
| CRE 2                       | 217,176,258              | 3,068            |
| CRE 3                       | 158,963,302              | 2,247            |
| CRE A                       | 129,448,294              | 812              |
| CRE B                       | 283,770,227              | 1,047            |
| Total                       | 1,365,327,563            | 17,058           |
| SNV frequency               | 0.125 x 10 <sup>-4</sup> |                  |

| Individual Mice – Cd83 locus | BP Sequenced           | SNV Numbers |
|------------------------------|------------------------|-------------|
| Mock 0                       | 55,364,207             | 1,084       |
| Mock 1                       | 108,289,364            | 3,717       |
| Mock 2                       | 83,037,139             | 3,241       |
| Mock 3                       | 88,228,089             | 4,651       |
| Mock A                       | 102,008,318            | 562         |
| Mock B                       | 143,518,757            | 364         |
| Total                        | 580,445,874            | 13,619      |
| SNV frequency                | $0.235 \times 10^{-4}$ |             |

| Individual Mice – Cd83 locus | BP Sequenced           | Mutation Numbers |
|------------------------------|------------------------|------------------|
| CRE 0                        | 45,070,336             | 374              |
| CRE 1                        | 98,460,695             | 1,489            |
| CRE 2                        | 77,610,020             | 1,275            |
| CRE 3                        | 83,801,858             | 1,631            |
| CRE A                        | 183,932,911            | 282              |
| CRE B                        | 149,781,465            | 113              |
| Total                        | 638,657,285            | 5,164            |
| SNV frequency                | $0.081 \times 10^{-4}$ |                  |

**Supporting Information Table 4.**

**Genomic regions analyzed.** Regions with coverage higher than 10,000 reads/position were considered.

| Gene    | Chromosome | Start position | End position | Strand orientation | Median per base coverage |         |
|---------|------------|----------------|--------------|--------------------|--------------------------|---------|
|         |            |                |              |                    | Mock                     | TATCRE  |
| S $\mu$ | chr12      | 113425705      | 113426125    | reverse strand     | 148,566                  | 296,069 |
| Jh4     | chr12      | 113427982      | 113428526    | reverse strand     | 156,022                  | 129,194 |
| Cd83    | chr13      | 43785141       | 43786095     | forward strand     | 111,045                  | 104,886 |

Reference genome GRCm38
